# Supplementary material
Source: Springer Nature journal article supplement (https://www.springermedizin.de/resource/supplementary/13063_2012_1333_MOESM1_ESM.pdf/9619830)

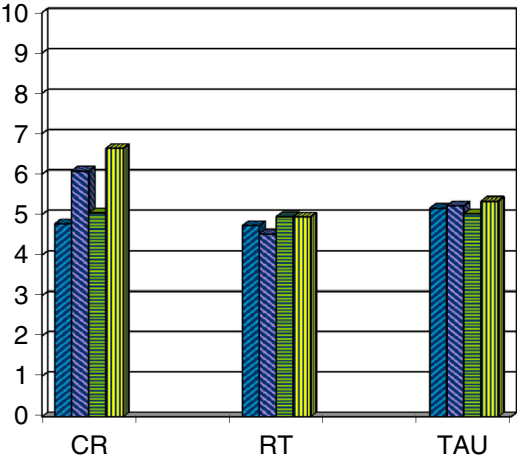

- Performance initial
- Performance post
- Satisfaction initial
- Satisfaction post

Supplement: MOESM1 [file 9619830]
